# Supplementary material for: Systematic Analysis of a Pyroptosis-Related Signature to Predict the Prognosis and Immune Microenvironment of Lower-Grade Glioma
Source: MDPI journal article supplement (doi:10.3390/cells11243980), 2022-12-09
Supplement: s1 [file s1]

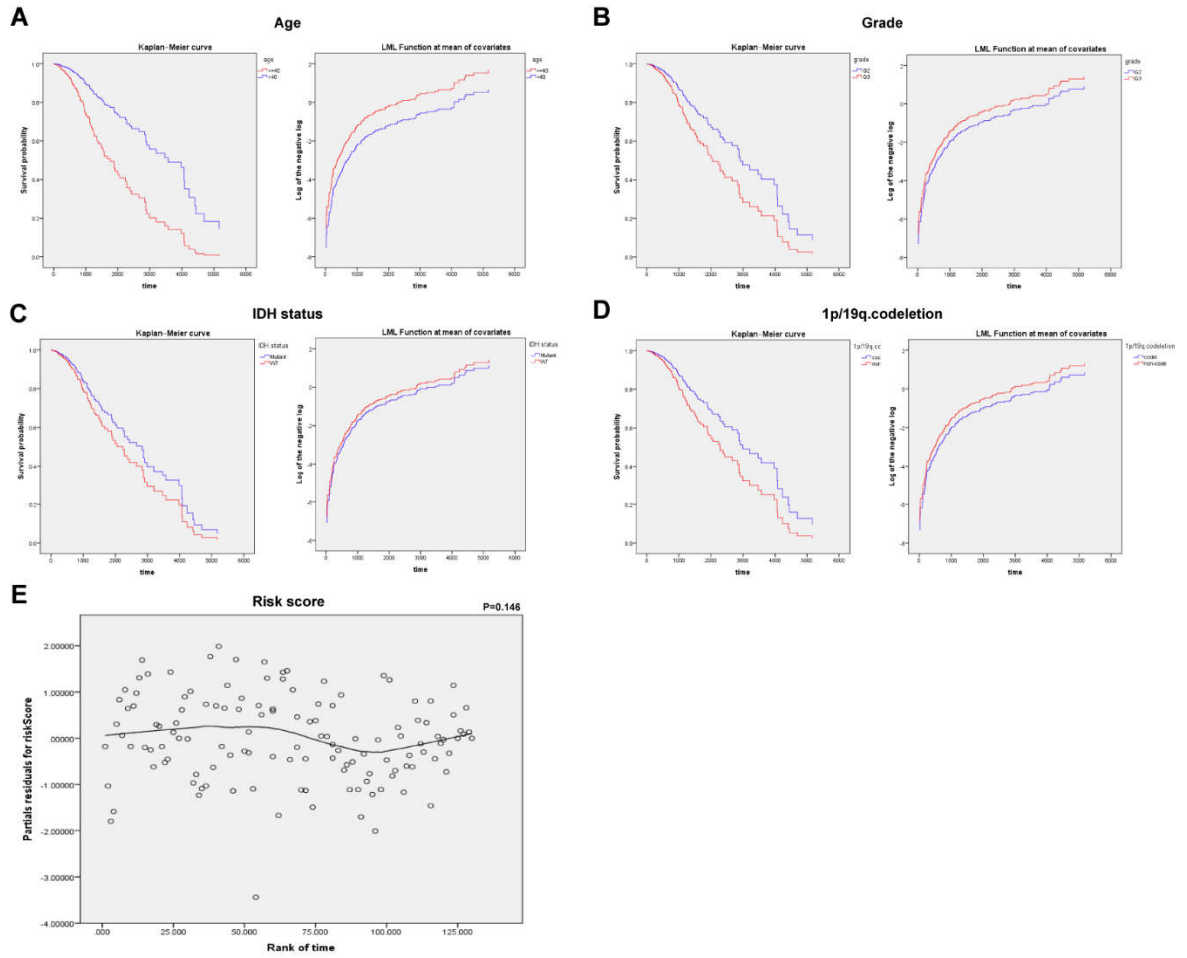

**Supplementary Figure S1.** Cox proportional hazard (PH) test was conducted before constructing the nomogram. (A-D) Schoenfeld's test showed that age, grade, IDH mutation status, and 1p/19q codeletion met the PH test. (E) Schoenfeld's test showed that the pyroptosis-related risk score met PH test ( $p > 0.05$ ).

Table S1. Comparison of AUC values of different prognostic models based on TCGA-LGG data

| Publication                | Types of prognostic models | AUC values |        |        |
|----------------------------|----------------------------|------------|--------|--------|
|                            |                            | 1-year     | 3-year | 5-year |
| Ours                       | Pyroptosis                 | 0.867      | 0.848  | 0.750  |
| Miao et al.,<br>2022 [32]  | Cuproptosis                | 0.787      | 0.824  | 0.760  |
| Yan et al.,<br>2022 [33]   | Cuproptosis,<br>LncRNA     | 0.841      | 0.839  | 0.768  |
| Zhao et al.,<br>2021 [34]  | Ferroptosis                | 0.855      | 0.834  | 0.753  |
| Huang et al.,<br>2022 [35] | Ferroptosis,<br>LncRNA     | 0.893      | 0.811  | 0.719  |
